# Supplementary material for: Identification of key modules and hub genes associated with lung function in idiopathic pulmonary fibrosis
Source: PeerJ. 2020 Sep 8;8:e9848. doi: 10.7717/peerj.9848 (PMC7485506; doi:10.7717/peerj.9848)
Supplement: Supplemental Information 5 [file peerj-08-9848-s005.xlsx]

## Sheet: RRA_gene_2sets_logFC
gene	GSE24206(log2FC)	GSE32537(log2FC)
BPIFB1	3.84905	3.98176
MMP7	3.22975	3.41626
KRT5	2.57424	3.15484
SFRP2	2.66066	2.62125
ASPN	2.4413	2.86813
ARMC3	2.25529	2.48433
IL13RA2	2.30957	2.39721
TMPRSS4	2.21146	2.73919
FAM216B	2.10867	2.96657
RSPH1	2.21464	2.28153
TSPAN1	2.08466	2.27868
KRT15	2.75146	2.23464
SLITRK6	2.2906	2.22876
CD24	2.01183	2.50339
THY1	2.00546	2.18475
CDH3	2.77265	2.15689
SPAG6	1.92316	2.6457
DSC3	1.89026	2.36594
FAM81B	2.14609	2.0019
SPATA18	2.05714	2.0008
VSIG1	1.86938	2.30615
CXCL13	2.50155	1.99033
SFRP4	1.92975	1.98835
CXCL14	2.12218	1.98511
ALOX15	1.82377	1.94177
PLEKHS1	1.81787	2.40831
CYP24A1	2.43521	1.93216
C1orf194	1.88766	1.91798
LRRN1	2.16677	1.89118
PRSS12	2.08149	1.88878
COL1A1	1.7449	1.88717
MUC5B	1.71945	2.02272
COMP	2.35462	1.83726
SPAG17	1.69585	2.35203
KLHL13	2.34689	1.78091
C20orf85	2.34717	1.77449
SERPIND1	3.51036	1.64992
MS4A2	1.64162	1.95846
MNS1	1.64068	1.95713
SULF1	1.764	1.73489
GPR87	2.76006	1.72552
FNDC1	1.63525	1.97252
MORN5	1.97909	1.66649
TPPP3	2.09225	1.65792
MMP1	3.29138	3.23465
HSPA4L	1.56923	2.0319
CAPS	1.56893	1.82178
MXRA5	2.20454	1.5991
CCDC113	2.36595	1.59152
SPA17	1.55077	1.5595
CLCA2	1.93229	1.55438
CHIT1	3.19126	0.971542
COL3A1	2.05432	1.54692
NELL2	1.5202	1.80122
GSTA1	1.50926	1.79381
COL15A1	2.73284	1.52671
CNTN3	2.04129	1.51307
BCHE	1.71807	1.51087
CCDC170	1.49266	1.7676
CHST9	1.84562	3.05908
APLNR	3.16133	1.09107
CCDC146	1.48215	1.86906
FANK1	1.64572	1.4778
ENKUR	1.47025	2.55387
SERPINI2	1.61367	1.45714
OGN	1.4655	1.6547
GXYLT2	1.57431	1.43923
CTHRC1	2.45419	1.43889
MS4A8	1.30982	3.04966
VCAM1	1.4961	1.42396
STOML3	1.40209	2.30694
CYP2F1	1.97033	1.37308
MUC16	2.04793	1.36442
FAP	1.39902	1.40752
EFHC1	1.62761	1.36088
WDR66	1.39085	1.64789
ECM2	1.82429	1.33717
TRIM29	1.39041	1.61802
CP	1.31205	2.95001
SLFN13	1.80444	1.33028
ZNF273	1.37057	1.50779
WDR78	1.36564	2.67231
LRRC17	1.36043	2.09023
DNAH12	1.22878	2.92646
GPX8	1.88611	1.2896
PSD3	1.90864	1.28236
MUC4	1.43004	1.27806
SNTN	2.47066	2.87952
PAMR1	2.13926	1.26471
TSHZ2	1.37289	1.26177
FAT2	1.33313	1.51547
IQUB	1.32308	1.80204
COL10A1	2.68928	1.23348
CDH2	1.31963	1.65445
CLIC6	1.67709	1.23921
CCL18	1.91691	1.2332
MMP12	2.04433	1.23071
COL17A1	1.31056	1.69908
SLC4A11	1.39187	1.22099
PROM1	2.17807	2.80804
PCDH7	1.29243	1.30747
ROBO2	1.92495	1.20851
CTSK	1.48019	1.20508
SLN	1.28766	2.16756
DZIP3	1.28547	1.49618
MMP10	2.65324	1.0925
ZNF711	1.40681	1.19533
EYA2	1.71528	1.19341
NAP1L3	1.82596	1.18761
VSNL1	1.54886	1.18283
SUSD4	1.27166	1.38398
KRT6A	2.64909	0.970346
CWH43	1.26186	1.18327
PCP4	1.4636	1.17184
AMPD1	1.24862	1.84759
CDCA7	1.36512	1.16283
AQP5	1.3221	1.15517
CAPS2	1.47826	1.15452
CLDN1	1.24294	1.41994
IL33	1.61086	1.15054
TMEM45A	1.54308	1.14814
MSMB	3.13478	2.65251
TRIM59	1.45209	1.13248
BRINP3	1.22697	1.16872
C12orf75	1.76322	1.12975
CXCL12	1.96285	1.12946
CRIP1	2.49339	0.580575
DOK5	1.50613	1.12616
OSBPL6	1.21655	1.17099
TMEM231	1.62874	1.12404
CCDC60	1.21521	1.47356
GJB2	1.51288	1.12159
EPHA3	1.20884	1.44163
CENPK	1.20572	1.1849
PLXDC1	1.2393	1.10195
WDR49	1.09657	2.61589
PLN	1.19536	1.76666
ANKRD45	1.43657	1.0895
THBS2	1.32776	1.08301
MFAP2	1.84454	1.08291
DTHD1	0.985949	2.5778
CRISPLD1	1.34934	1.07691
STK33	1.18489	1.3957
MEOX1	2.38066	0.635509
SYTL2	1.18222	1.63288
NREP	1.18059	1.1418
CCL11	1.34731	1.05222
ZMYND12	1.17944	1.04632
ZBBX	1.70252	2.50305
DNAI2	1.33975	1.03792
MZB1	1.16621	1.45422
ERICH3	1.3612	2.48642
CFH	1.15832	1.33971
ROPN1L	1.3597	1.02217
MMP13	1.15824	2.37145
SEMA3D	1.35178	1.01733
GLT8D2	1.15778	1.28037
ENPP5	1.5623	1.00911
CCDC80	1.15414	2.00337
ITM2C	1.18922	1.00717
CDHR3	1.47666	2.46402
GABRP	2.31245	0.783594
HMCN1	1.14422	1.38025
DNER	1.55822	1.00122
ZNF521	1.53758	0.99278
SSPN	1.13872	1.2458
LRRIQ1	1.09196	2.44554
TNFRSF19	1.13674	1.23565
RIBC2	1.64018	0.989328
BMP4	1.22528	0.986634
CBLN4	1.95012	0.98437
DLG2	1.18639	0.982704
FERMT1	1.13046	1.73433
ANLN	1.43535	0.97809
EFCAB7	1.16162	0.974032
TEX9	0.438148	2.38294
PRSS2	2.21563	0.405295
ITGB8	1.11407	1.14353
GZMK	1.11187	1.15592
ALDH3A1	2.10114	0.965076
PRRX1	1.10647	0.977292
GNAL	1.10502	1.09219
COL1A2	1.63595	0.960831
CTSE	1.10726	0.959867
LRRC6	1.09955	1.35223
DIO2	1.0989	1.71989
CCL19	1.57644	0.95477
SOX2	0.720654	2.35646
CHST6	1.47896	0.944761
SCG5	2.02293	0.943694
CRABP2	1.09127	1.33407
GGTA1P	1.52317	0.940499
CAPN13	1.09018	1.66561
CCDC78	2.19787	0.388426
PTGFRN	1.54067	0.938091
SLAMF7	1.32702	0.933276
SPATA17	1.1632	2.35129
C1orf158	1.19721	0.931193
CD1A	1.07935	1.24298
ARMC2	1.23925	0.927657
BPIFA1	1.49246	2.34313
HS6ST2	2.15783	0.732392
ANKRD36C	1.07684	1.32886
CPXM1	1.14423	0.92101
SCGB1A1	2.37882	2.3076
MGC70870	1.89473	0.91352
ODF2L	1.07073	0.943529
CLHC1	1.3419	0.911676
RSPH9	1.88192	0.906794
FMO1	1.19483	0.905338
CLDN2	1.42522	0.905097
NTS	1.57321	0.902989
DLEC1	1.06641	1.08839
FBLN2	1.61933	0.902982
PIP	0.792285	2.29792
ITIH5	1.86494	0.893915
RGS13	1.06404	1.12109
MKI67	1.18781	0.893381
TOP2A	1.21857	0.89272
CCNB1	1.06264	1.04575
FZD3	1.05966	0.965785
TBC1D32	1.19084	0.890091
IGKC	1.05885	1.4149
ITGBL1	2.09378	0.64568
RGS22	0.983309	2.26126
FCER1A	1.04648	0.978011
BDKRB2	1.12563	0.880525
CROT	1.04418	0.981983
CCL24	1.22203	0.872434
DNAH3	0.211084	2.23828
CETN2	1.03863	0.980345
RAD51AP1	1.0639	0.863976
HHLA2	1.03634	2.22562
FHOD3	1.1617	0.860977
ZNF680	1.03497	0.885797
CD27	1.03452	1.05355
FGF14	1.03371	2.01081
FBXL13	1.04834	0.858357
ISM1	1.05577	0.856893
KCNJ16	1.03293	0.928389
SLC28A3	1.66701	0.855274
CD79A	1.03667	0.848514
TUBA4B	1.31215	0.847487
GLB1L2	1.0248	1.08109
EGFL6	1.31414	0.846252
CPA3	1.02375	1.26083
PRTFDC1	1.0173	1.24815
IL1R2	-4.32612	-3.17912
MGAM	-3.48834	-2.67172
S100A12	-3.85135	-2.39843
MT1M	-3.0931	-2.389
IL18RAP	-2.97667	-2.21172
RNASE2	-2.26966	-2.00251
PTX3	-3.37709	-1.95821
CLEC4E	-2.2242	-2.47674
IL18R1	-2.33072	-1.85042
CSRNP1	-2.08512	-1.80839
FPR2	-1.99617	-1.9129
CHI3L2	-1.89261	-1.89649
VNN2	-2.41094	-1.58766
FPR1	-1.75459	-1.70692
TIMP4	-2.1716	-1.56805
S100A8	-1.71178	-2.75922
SERPINA3	-2.47154	-1.528
PEBP4	-1.69053	-2.09629
PGC	-1.85479	-1.52529
PROK2	-3.463	-1.52291
GLT1D1	-1.75709	-1.51637
SDR16C5	-1.87154	-1.47684
CA4	-1.56264	-1.64778
FCN3	-0.924282	-3.07321
S100A9	-1.50152	-1.62505
IL6	-3.16197	-1.3824
ACSL1	-1.47177	-1.42265
ZNF385B	-1.80881	-1.32987
THBS1	-1.72225	-1.31898
NECAB1	-1.19136	-2.68331
FMO5	-1.31755	-1.58055
FAM107A	-2.12251	-1.27803
MT1X	-1.65778	-1.27777
ST6GALNAC3	-1.29548	-1.51481
GPX3	-1.28483	-1.89727
SIGLEC10	-1.25524	-1.25016
CTH	-1.96897	-1.23359
CXCR2	-2.37321	-1.23151
MT1G	-1.42813	-1.22346
ADM	-2.88548	-1.22131
CD163	-1.2345	-1.54209
IRS2	-1.23155	-1.28692
SLCO4A1	-1.14949	-2.65461
GPIHBP1	-1.40586	-1.20381
MAOA	-1.2502	-1.19256
FIBIN	-1.18324	-1.70407
MT2A	-1.23568	-1.15015
VNN1	-1.8706	-1.1437
CLEC4D	-2.98082	-0.951393
TMEM100	-0.522697	-2.47509
OLAH	-2.26812	-1.13969
MEFV	-1.3121	-1.13173
SLC39A8	-1.14028	-1.55244
GRIA1	-1.13995	-1.40445
BTNL9	-1.12515	-1.92247
HSD17B6	-1.11948	-1.26004
CCDC141	-1.18729	-1.09483
CXCL8	-2.62335	0.276161
SCN7A	-1.5072	-1.09231
HMGCS1	-1.09464	-1.09156
NAMPT	-2.09592	-1.09076
EDNRB	-1.25762	-1.08946
SOCS3	-1.31357	-1.08829
ITGA10	-1.06463	-1.1202
CXCR1	-1.06098	-1.78094
SLC6A4	-0.329744	-2.20315
INSIG1	-1.19924	-1.07738
SERPINE1	-1.57693	-1.07389
ERRFI1	-1.68177	-1.0722
TUBB1	-0.659161	-2.13134
KLF4	-1.08276	-1.06604
HAL	-1.04228	-1.19284
MMP8	-1.63073	-1.06095
SLC19A2	-1.65529	-1.04911
DCXR	-1.02023	-1.08358
ANKRD1	-0.554713	-2.02984
PDGFRA	-1.00709	-1.21595
AASS	-1.10326	-1.02835
